# Supplementary material for: Application of cup-shaped trilactams for selective extraction of volatile compounds by gas chromatography-mass spectrometry
Source: Royal Society of Chemistry journal article supplement (doi:10.1039/d0an01061h), 2020-01-01
Supplement: d0an01061h1.pdf [file d0an01061h1.pdf]

## Supplementary Information

### Application of cup-shaped trilactams for selective extraction of volatile compounds by gas chromatography-mass spectrometry

*Sitanan Sartyoungkul<sup>a</sup>, Isaya Thaveesangsakulthai<sup>b</sup>, Mark Kristan Espejo Cabello<sup>a</sup>, Chadin Kulsing<sup>\*b,c</sup>, and Hidehiro Sakurai<sup>\*a</sup>*

*<sup>a</sup>Division of Applied Chemistry, Graduate School of Engineering, Osaka University, Suita  
565-0871, Japan*

*<sup>b</sup>Department of Chemistry, Faculty of Science, Chulalongkorn University, Bangkok 10330,  
Thailand*

*<sup>c</sup>Chromatographic Separation and Flavor Chemistry Research Unit and Center of Molecular  
Sensory Science, Department of Chemistry, Faculty of Science, Chulalongkorn University,  
Bangkok 10330, Thailand*

## Supplementary figures and Table

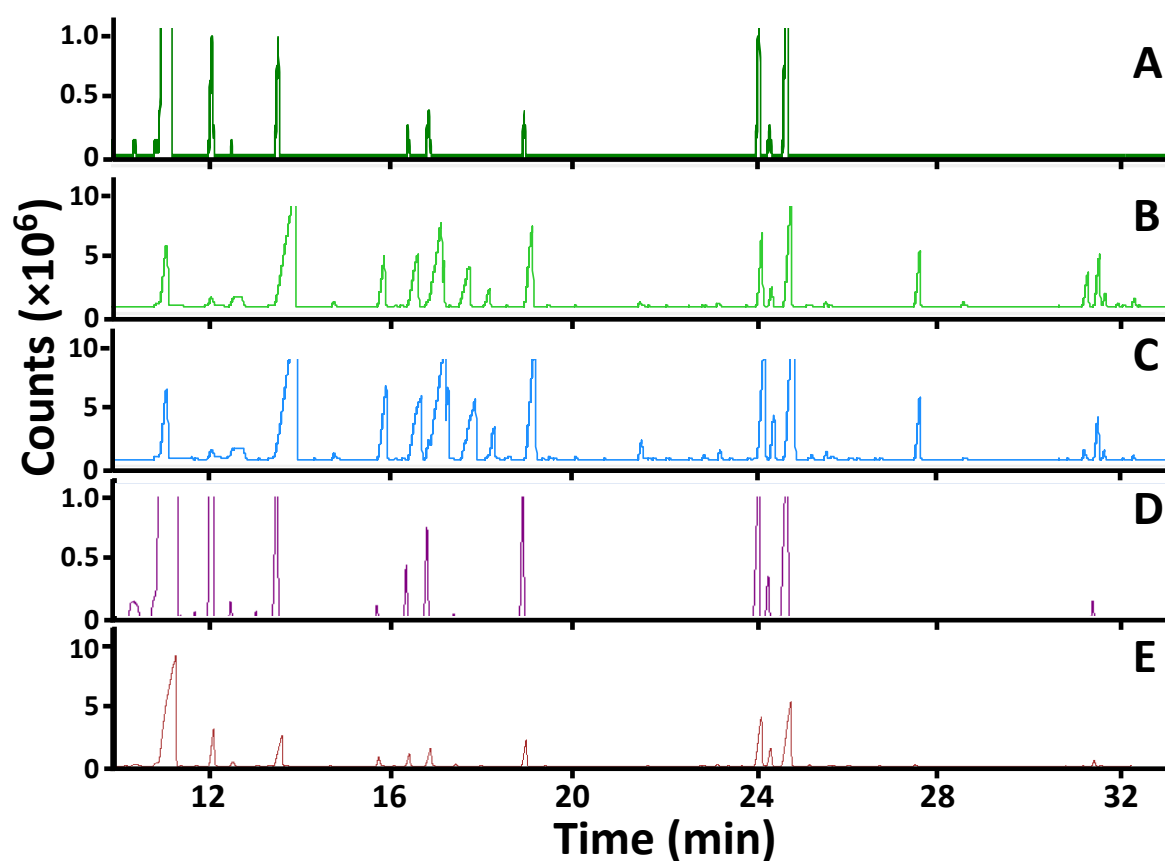

**Fig. S1.** GC–qMS total ion chromatogram of (A) volatile compounds present in a perfume solution with 3 days extraction in MeOH (control sample) with the insert of the corresponding chromatograms of different extracts obtained by using (B) (+)-**1**, (C) (–)-**1** and (D) achiral 2-piperidinone, and (E) result obtained with the same condition as (B) except that extraction time was 5 h. The identified compounds are listed in Table S1.

**Table S1.** Compound profiles of retention index from literature ( $I_{Lit}$ ), average peak area (counts·s) with  $n = 3$ , enrichment factor (EF) analyzed with GC–MS with the potential compounds showing significant chiral recognition highlighted in bold and italic. The average match score for the compounds is 841.

| No. | Compound name                 | $I_{Lit}$          | Peak area in Control                               | Perfume(-)-1                                        |                  | Perfume(+)-1                                        |                   | Perfume-(2-Piperidinone)  |     |
|-----|-------------------------------|--------------------|----------------------------------------------------|-----------------------------------------------------|------------------|-----------------------------------------------------|-------------------|---------------------------|-----|
|     |                               |                    |                                                    | Peak area                                           | EF               | Peak area                                           | EF                | Peak area                 | EF  |
| 1   | Camphene                      | 952                | $(9.2\pm 4.0)\times 10^4$                          | 0±0                                                 | - <sup>a</sup>   | 0±0                                                 | -                 | 0±0                       | -   |
| 2   | Sabinene                      | 974                | $(22\pm 7.2)\times 10^5$                           | $(9.1\pm 3.9)\times 10^4$                           | -                | $(1.6\pm 1.2)\times 10^5$                           | -                 | 0±0                       | -   |
| 3   | 3-Carene                      | 1011               | $(3.0\pm 1.6)\times 10^5$                          | $(2.0\pm 1.8)\times 10^4$                           | -                | $(3.4\pm 1.7)\times 10^4$                           | -                 | 0±0                       | -   |
| 4   | Sylvestrene                   | 1027               | $(11\pm 1.2)\times 10^7$                           | $(2.5\pm 1.1)\times 10^7$                           | -                | $(2.8\pm 0.34)\times 10^7$                          | -                 | 0±0                       | -   |
| 5   | 7-Octen-2-ol, 2,6-dimethyl-   | 1064               | $(13\pm 9.1)\times 10^5$                           | $(8.0\pm 4.5)\times 10^6$                           | 6.1              | $(1.7\pm 0.73)\times 10^7$                          | 13                | $(6.6\pm 0.8)\times 10^4$ | 1.5 |
| 6   | Linalool                      | 1099               | $(1.8\pm 1.3)\times 10^7$                          | $(8.0\pm 4.5)\times 10^7$                           | 4.5              | $(1.2\pm 0.18)\times 10^8$                          | 6.5               | $(7.1\pm 0.8)\times 10^5$ | 1.1 |
| 7   | <b><i>l-menthol (LMT)</i></b> | <b><i>1175</i></b> | <b><i><math>(5.0\pm 4.4)\times 10^5</math></i></b> | <b><i>0±0</i></b>                                   | <b><i>-</i></b>  | <b><i><math>(2.7\pm 1.2)\times 10^7</math></i></b>  | <b><i>54</i></b>  | 0±0                       | -   |
| 8   | Linalyl formate               | 1215               | 0±0                                                | $(5.2\pm 0.017)\times 10^7$                         | NA <sup>b</sup>  | $(6.2\pm 2.9)\times 10^7$                           | NA                | 0±0                       | -   |
| 9   | Citronellol                   | 1228               | $(3.1\pm 2.6)\times 10^5$                          | $(5.4\pm 4.1)\times 10^6$                           | 17               | $(6.7\pm 2.4)\times 10^6$                           | 22                | $(0.3\pm 0.3)\times 10^4$ | 0.2 |
| 10  | Carvone                       | 1242               | $(0.20\pm 0.20)\times 10^4$                        | $(4.3\pm 3.7)\times 10^5$                           | 22×10            | $(7.3\pm 2.9)\times 10^5$                           | 37×10             | 0±0                       | -   |
| 11  | Linalyl acetate               | 1257               | $(5.6\pm 4.5)\times 10^6$                          | $(2.9\pm 2.0)\times 10^7$                           | -                | $(4.5\pm 1.5)\times 10^7$                           | 8                 | $(2.7\pm 1.2)\times 10^5$ | 1.3 |
| 12  | <b><i>δ-Elemene</i></b>       | <b><i>1338</i></b> | <b><i><math>(4.4\pm 1.9)\times 10^4</math></i></b> | <b><i><math>(1.3\pm 0.68)\times 10^5</math></i></b> | <b><i>-</i></b>  | <b><i><math>(4.1\pm 1.8)\times 10^5</math></i></b>  | <b><i>9.3</i></b> | $(0.3\pm 0.3)\times 10^4$ | 0.6 |
| 13  | α-Terpinyl acetate            | 1350               | $(3.9\pm 3.4)\times 10^4$                          | $(2.3\pm 1.7)\times 10^5$                           | -                | $(4.4\pm 2.1)\times 10^5$                           | 11                | 0±0                       | -   |
| 14  | <b><i>Ylangene</i></b>        | <b><i>1372</i></b> | <b><i><math>(1.7\pm 1.2)\times 10^4</math></i></b> | <b><i>0±0</i></b>                                   | <b><i>-</i></b>  | <b><i><math>(7.4\pm 6.1)\times 10^5</math></i></b>  | <b><i>44</i></b>  | $(0.6\pm 0.3)\times 10^4$ | 22  |
| 15  | <b><i>Copaene</i></b>         | <b><i>1376</i></b> | <b><i><math>(5.3\pm 2.7)\times 10^4</math></i></b> | <b><i>0±0</i></b>                                   | <b><i>-</i></b>  | <b><i><math>(1.5\pm 0.67)\times 10^5</math></i></b> | <b><i>2.8</i></b> | $(0.6\pm 0.5)\times 10^4$ | 0.5 |
| 16  | β-Funebrene                   | 1414               | $(8.0\pm 3.1)\times 10^6$                          | $(2.2\pm 1.6)\times 10^7$                           | -                | $(3.7\pm 1.7)\times 10^7$                           | 4.6               | 0±0                       | -   |
| 17  | cis-Thujopsene                | 1429               | $(1.6\pm 0.63)\times 10^7$                         | $(4.0\pm 2.9)\times 10^7$                           | -                | $(6.6\pm 2.9)\times 10^7$                           | 4.1               | $(1.6\pm 0.3)\times 10^6$ | 0.5 |
| 18  | Cyclamal                      | 1466               | $(3.3\pm 2.9)\times 10^4$                          | $(6.9\pm 6.0)\times 10^5$                           | 21               | $(1.0\pm 0.41)\times 10^6$                          | 32                | 0±0                       | -   |
| 20  | γ-Himachalene                 | 1477               | 0±0                                                | $(1.9\pm 1.6)\times 10^5$                           | NA               | $(3.4\pm 0.0)\times 10^5$                           | NA                | 0±0                       | -   |
| 21  | α-Curcumene                   | 1483               | $(1.0\pm 0.80)\times 10^4$                         | $(0.60\pm 0.50)\times 10^4$                         | -                | $(1.2\pm 1.0)\times 10^5$                           | -                 | 0±0                       | -   |
| 21  | Lilial                        | 1533               | $(3.8\pm 3.3)\times 10^5$                          | $(7.0\pm 5.6)\times 10^6$                           | 19               | $(1.3\pm 0.47)\times 10^7$                          | 33                | 0±0                       | -   |
| 22  | <b><i>Kharismal (KRM)</i></b> | <b><i>1649</i></b> | <b><i>0±0</i></b>                                  | <b><i><math>(9.5\pm 8.3)\times 10^5</math></i></b>  | <b><i>NA</i></b> | <b><i><math>(5.0\pm 3.2)\times 10^6</math></i></b>  | <b><i>NA</i></b>  | 0±0                       | -   |
| 23  | β-Acorenol                    | 1649               | $(5.5\pm 4.8)\times 10^4$                          | 0±0                                                 | -                | $(1.5\pm 0.59)\times 10^5$                          | -                 | 0±0                       | -   |

<sup>a</sup>Insignificant enrichment effect.

<sup>b</sup>Enrichment factor was very high and could not be calculated due to the compounds not detected in control.

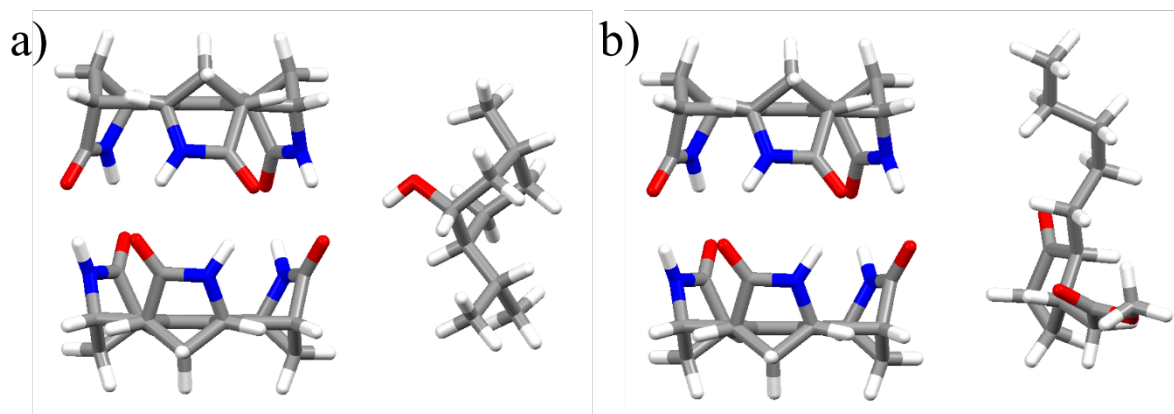

**Figure S2.** MD simulation displayed the initial molecular complex of (-)-1<sub>dimer</sub> and selected enrich compounds a) LMT and b) KRM. C, grey; N, Blue; O, red; H, white.

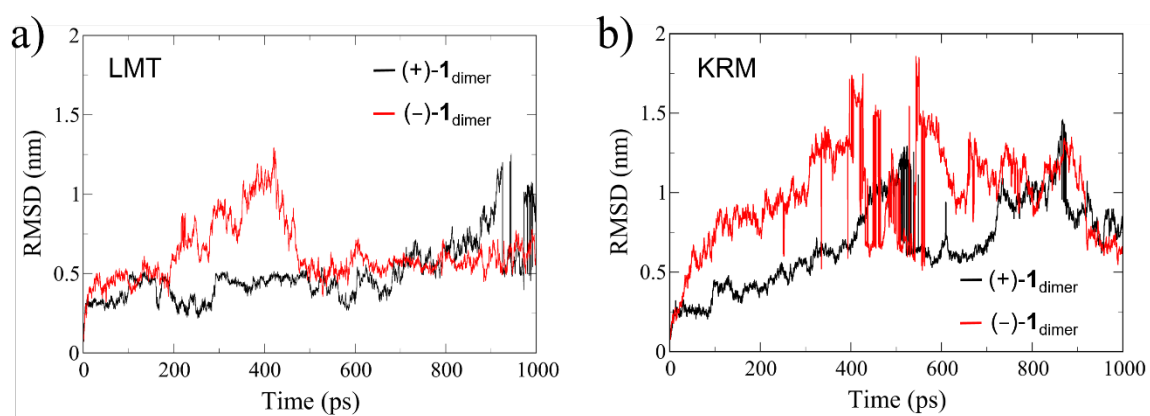

**Figure S3.** Root mean squared deviation (RMSD) measured the changes in movement of the selected enrich compounds a) LMT and b) KRM from their corresponding initial complexes structures; (+)-1<sub>dimer</sub> (black color) and (-)-1<sub>dimer</sub> (red color).

## Cartesian coordinates of optimized complex structures

a) (+)-**1**<sub>dimer</sub>-LMT

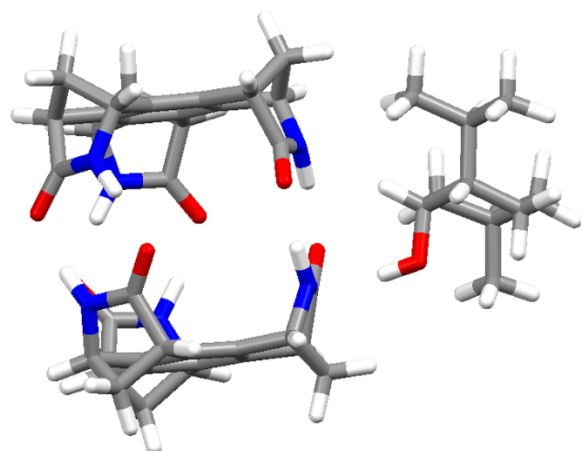

|   | X           | Y           | Z           |
|---|-------------|-------------|-------------|
| C | -2.98694100 | -3.12860700 | -0.14444500 |
| C | -4.22783200 | -3.15349600 | -1.03629100 |
| C | -2.46720000 | -3.33142200 | -2.42630000 |
| C | -1.86592500 | -3.26002200 | -1.02203800 |
| C | -3.74880200 | -4.15438100 | -2.12968800 |
| H | -4.41640100 | -4.21362500 | -2.99380100 |
| H | -3.54256900 | -5.15208900 | -1.73382000 |
| H | -5.19144000 | -3.30220100 | -0.55326800 |
| H | -1.81890100 | -3.65766400 | -3.23772000 |
| C | -1.45890500 | -2.95950000 | 1.73437200  |
| C | -1.60526400 | -2.74214800 | 3.23967300  |
| C | -3.69708000 | -2.73700700 | 2.41000500  |
| C | -2.78676400 | -2.97415200 | 1.20390900  |
| C | -2.92330300 | -3.53288600 | 3.49414300  |
| H | -3.33687600 | -3.38560900 | 4.49570000  |
| H | -2.83179400 | -4.59844200 | 3.26852000  |
| H | -0.73325700 | -2.93083400 | 3.86253300  |
| H | -4.76097300 | -2.93140000 | 2.28605300  |
| C | 1.13215700  | -3.03916200 | 1.06704000  |
| C | 0.79869300  | -3.31828900 | -1.14334800 |
| C | 1.57200800  | -4.06130300 | -0.01343400 |
| H | 1.19287000  | -5.07000200 | 0.16647500  |

|   |             |             |             |
|---|-------------|-------------|-------------|
| H | 2.65588500  | -4.07977700 | -0.15943400 |
| C | -0.38422700 | -3.08730800 | 0.89174300  |
| C | -0.59244600 | -3.25040500 | -0.51320800 |
| H | 1.53335700  | -3.14594700 | 2.07323200  |
| H | 0.87136300  | -3.67093600 | -2.17002300 |
| N | -3.43648200 | -1.36255900 | 2.90437400  |
| H | -3.93509200 | -0.52758400 | 2.56818100  |
| N | 1.62107000  | -1.79417100 | 0.40930700  |
| H | 1.60280800  | -0.87433600 | 0.87731000  |
| N | -3.09801900 | -2.01906900 | -2.71145000 |
| H | -2.60036000 | -1.22468600 | -3.13568900 |
| C | -4.12571300 | -1.83192200 | -1.83768600 |
| C | -2.15077200 | -1.29629900 | 3.34672500  |
| C | 1.34012700  | -1.88882000 | -0.93240100 |
| O | -4.80082600 | -0.81521800 | -1.67277800 |
| O | 1.45554000  | -1.00585700 | -1.77813400 |
| O | -1.52539200 | -0.29796200 | 3.70621500  |
| C | -0.31019700 | 3.23121100  | 0.41045900  |
| C | 1.13819500  | 3.20653300  | 0.89871500  |
| C | 1.23537200  | 2.92810600  | -1.33245700 |
| C | -0.25314700 | 3.06688700  | -1.00926000 |
| C | 1.83396000  | 3.91827300  | -0.29926200 |
| H | 2.92553800  | 3.87627000  | -0.26084700 |
| H | 1.49383900  | 4.94750400  | -0.43760400 |
| H | 1.33470400  | 3.54268100  | 1.91469900  |
| H | 1.53934800  | 3.02024800  | -2.37368600 |
| C | -2.73220800 | 3.28210700  | 0.27869200  |
| C | -3.87455900 | 3.39648500  | 1.28769600  |
| C | -1.97755800 | 3.44150400  | 2.49715400  |
| C | -1.52364800 | 3.32811900  | 1.04142900  |
| C | -3.21776100 | 4.35772400  | 2.32303900  |
| H | -3.79136800 | 4.46498100  | 3.24791600  |
| H | -2.97821600 | 5.33802200  | 1.90301600  |
| H | -4.86731800 | 3.61676700  | 0.90047300  |

|   |             |             |             |
|---|-------------|-------------|-------------|
| H | -1.23048700 | 3.71787400  | 3.23917400  |
| C | -3.71667600 | 2.95568300  | -2.19103000 |
| C | -1.72261400 | 2.81806900  | -3.22434300 |
| C | -3.00048000 | 3.70054100  | -3.34834100 |
| H | -2.81212900 | 4.75585800  | -3.13491100 |
| H | -3.52099300 | 3.58775200  | -4.30348000 |
| C | -2.67704700 | 3.12102400  | -1.08211700 |
| C | -1.41193400 | 3.01751300  | -1.74134100 |
| H | -4.74665300 | 3.22365600  | -1.96201300 |
| H | -0.90623200 | 2.94845000  | -3.93193800 |
| N | -2.67274200 | 2.17934700  | 2.85067800  |
| H | -2.19566200 | 1.34882500  | 3.22646300  |
| N | -3.60414900 | 1.56884900  | -2.70621500 |
| H | -4.12439300 | 0.77019500  | -2.31898000 |
| N | 1.70673100  | 1.65647200  | -0.72716700 |
| H | 1.64734600  | 0.74933200  | -1.20472300 |
| C | 1.57520400  | 1.74845700  | 0.62500600  |
| C | -3.79227300 | 2.07039600  | 2.08328400  |
| C | -2.37616100 | 1.41416500  | -3.27309700 |
| O | 1.71406100  | 0.84892400  | 1.45583900  |
| O | -1.86204700 | 0.37510800  | -3.68967600 |
| O | -4.55430800 | 1.10703200  | 1.99213700  |
| C | 6.23266000  | 0.00628900  | 0.92834900  |
| C | 4.87351600  | -0.37179000 | 0.30981800  |
| C | 4.87401800  | -0.22088400 | -1.22043500 |
| C | 6.00971500  | -0.98122500 | -1.94161200 |
| C | 7.36768400  | -0.68688900 | -1.26547200 |
| C | 7.32518000  | -0.86397400 | 0.26309100  |
| H | 3.90105100  | -0.53362500 | -1.61554800 |
| H | 4.08655300  | 0.26415600  | 0.72684700  |
| H | 6.16857600  | -0.27042400 | 1.99049600  |
| H | 6.05826700  | -0.58947000 | -2.96796900 |
| H | 8.14121500  | -1.33856200 | -1.69261600 |
| H | 7.67053000  | 0.34129600  | -1.50515300 |

|   |            |             |             |
|---|------------|-------------|-------------|
| H | 7.11130900 | -1.91064300 | 0.50386900  |
| H | 8.30966700 | -0.64603100 | 0.69016900  |
| H | 4.96076900 | 0.85177600  | -1.44466600 |
| C | 5.73543600 | -2.49166500 | -2.05696500 |
| H | 4.76717400 | -2.67005100 | -2.54066300 |
| H | 6.50904900 | -2.97747400 | -2.66431600 |
| H | 5.70681400 | -2.96966900 | -1.07552900 |
| O | 4.59800600 | -1.72851200 | 0.71591000  |
| H | 3.64745200 | -1.87227500 | 0.58224700  |
| C | 6.53639300 | 1.53084400  | 0.87808100  |
| H | 6.74578700 | 1.81688500  | -0.16145400 |
| C | 5.35118300 | 2.38858400  | 1.35839200  |
| H | 5.64487700 | 3.44220900  | 1.43271800  |
| H | 4.49891700 | 2.33023900  | 0.67605800  |
| H | 5.00484200 | 2.06439100  | 2.34761200  |
| C | 7.78425100 | 1.87242200  | 1.71145800  |
| H | 7.99920900 | 2.94624700  | 1.66772700  |
| H | 7.62826600 | 1.60564400  | 2.76465900  |
| H | 8.67607300 | 1.34460100  | 1.36175400  |

Absolute energy = -2638.29736632 a.u.

b) (+)-**1**<sub>dimer</sub>-KRM

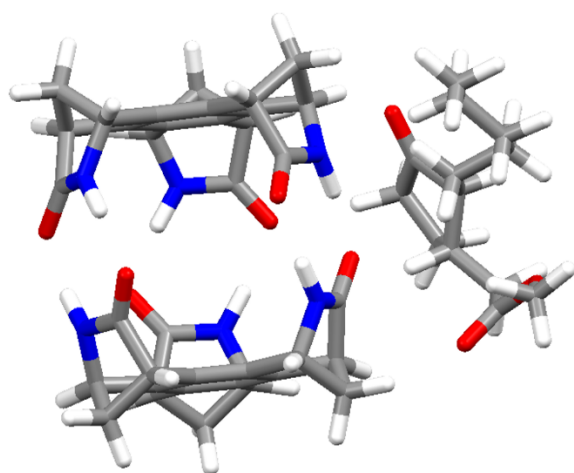

|   | X           | Y           | Z           |
|---|-------------|-------------|-------------|
| C | -2.77399900 | -3.21511900 | -0.59962200 |
| C | -3.32182200 | -3.36268900 | -2.01937800 |



|   |             |             |             |
|---|-------------|-------------|-------------|
| C | -1.08406300 | -3.51380300 | -2.20298100 |
| C | -1.35305800 | -3.32253200 | -0.71126000 |
| C | -2.30228900 | -4.39378600 | -2.58917200 |
| H | -2.38518700 | -4.54282700 | -3.66950200 |
| H | -2.32812600 | -5.35254600 | -2.06507200 |
| H | -4.38942000 | -3.54102600 | -2.13153700 |
| H | -0.09078300 | -3.84940500 | -2.49676000 |
| C | -2.52436500 | -2.85485800 | 1.78837600  |
| C | -3.47596900 | -2.56574100 | 2.94895200  |
| C | -4.77208000 | -2.73036700 | 1.11713400  |
| C | -3.34640600 | -2.97777400 | 0.62397400  |
| C | -4.70225100 | -3.41827400 | 2.50630200  |
| H | -5.59972000 | -3.24143900 | 3.10576000  |
| H | -4.48085400 | -4.48727400 | 2.45100300  |
| H | -3.08362400 | -2.66857400 | 3.95872300  |
| H | -5.59045200 | -2.99463000 | 0.44945800  |
| C | 0.01866200  | -2.78778400 | 2.64124200  |
| C | 0.94662500  | -3.18303800 | 0.62904900  |
| C | 1.01111600  | -3.82113900 | 2.04642400  |
| H | 0.63435100  | -4.84696500 | 2.06693800  |
| H | 2.00611200  | -3.76497600 | 2.49398400  |
| C | -1.16051600 | -2.95454100 | 1.67870600  |
| C | -0.56312300 | -3.19603400 | 0.40190700  |
| H | -0.19164000 | -2.82082000 | 3.70889900  |
| H | 1.59617300  | -3.56695700 | -0.15226000 |
| N | -4.85399900 | -1.31784600 | 1.56491700  |
| H | -5.09165500 | -0.53409800 | 0.94191900  |
| N | 0.72899400  | -1.54250500 | 2.25274700  |
| H | 0.49527200  | -0.61221400 | 2.62582200  |
| N | -1.47765200 | -2.26201500 | -2.89599000 |
| H | -0.84616900 | -1.45755500 | -3.00928400 |
| C | -2.81983700 | -2.08474000 | -2.73673400 |
| C | -4.02071100 | -1.15125500 | 2.62929800  |
| C | 1.22520900  | -1.70872300 | 0.99814300  |

|   |             |             |             |
|---|-------------|-------------|-------------|
| O | -3.48872800 | -1.09778800 | -3.04462000 |
| O | 1.72857300  | -0.84699100 | 0.27205300  |
| O | -3.71639900 | -0.09908700 | 3.19228500  |
| C | -0.96793000 | 3.33971900  | 0.87279000  |
| C | -0.04098100 | 3.43417900  | 2.08472200  |
| C | 1.29473000  | 3.03245500  | 0.31370400  |
| C | -0.12174200 | 3.09357200  | -0.25357000 |
| C | 1.19354200  | 4.11355300  | 1.42146100  |
| H | 2.07921500  | 4.14017000  | 2.06204700  |
| H | 0.97340700  | 5.11099400  | 1.03282700  |
| H | -0.45498100 | 3.84216600  | 3.00474500  |
| H | 2.12146700  | 3.07835100  | -0.39186800 |
| C | -2.89984800 | 3.22406100  | -0.59130900 |
| C | -4.41427100 | 3.31469400  | -0.40323800 |
| C | -3.52328000 | 3.54934600  | 1.64944200  |
| C | -2.32832200 | 3.39241700  | 0.70869800  |
| C | -4.47815100 | 4.36888600  | 0.74174800  |
| H | -5.47445300 | 4.48358600  | 1.17812500  |
| H | -4.07165500 | 5.34061300  | 0.44986000  |
| H | -5.02520800 | 3.44707700  | -1.29394000 |
| H | -3.32896400 | 3.91291700  | 2.65704000  |
| C | -2.31890900 | 2.69068300  | -3.15169100 |
| C | -0.08321300 | 2.59714700  | -2.87419200 |
| C | -1.08080600 | 3.39612300  | -3.76758200 |
| H | -1.05294700 | 4.47169100  | -3.57591900 |
| H | -0.97356600 | 3.19379400  | -4.83720000 |
| C | -2.08696500 | 2.98310500  | -1.66958400 |
| C | -0.66946300 | 2.91414300  | -1.49750800 |
| H | -3.30183400 | 2.91194200  | -3.56412200 |
| H | 0.99082800  | 2.72637800  | -2.99747100 |
| N | -4.26258200 | 2.26202700  | 1.65606300  |
| H | -4.04795800 | 1.48421600  | 2.29399600  |
| N | -1.92064100 | 1.28111600  | -3.39331200 |
| H | -2.56244500 | 0.48140800  | -3.30984700 |

|   |             |             |             |
|---|-------------|-------------|-------------|
| N | 1.36351300  | 1.82697600  | 1.18026800  |
| H | 1.56628100  | 0.88873800  | 0.81047200  |
| C | 0.50479000  | 1.99202300  | 2.22465900  |
| C | -4.75469500 | 2.03879800  | 0.40588100  |
| C | -0.58768500 | 1.16279100  | -3.16288900 |
| O | 0.18231900  | 1.15471900  | 3.06930700  |
| O | 0.07687800  | 0.12053200  | -3.14003100 |
| O | -5.30537400 | 1.02164600  | -0.01811500 |
| C | 3.33375100  | 0.23801000  | -3.66327900 |
| C | 4.57496000  | 0.24562900  | -1.50675100 |
| C | 4.17001500  | -1.19737100 | -1.89403000 |
| C | 4.02251000  | -1.11680800 | -3.42962100 |
| H | 2.24051300  | 0.14397300  | -3.63147000 |
| H | 3.59607500  | 0.74146400  | -4.59922600 |
| H | 5.60685100  | 0.39375600  | -1.87667700 |
| H | 3.18617100  | -1.39808800 | -1.45427900 |
| H | 5.01655500  | -1.13570800 | -3.89790300 |
| H | 3.45303400  | -1.96062600 | -3.83167500 |
| C | 3.72176200  | 1.08552500  | -2.46243000 |
| O | 3.37089900  | 2.23840500  | -2.27268700 |
| C | 5.14044400  | -2.30858200 | -1.44897200 |
| H | 4.89907400  | -3.22406900 | -1.99995300 |
| H | 6.17461500  | -2.02772500 | -1.67226700 |
| O | 5.98592000  | -2.12414800 | 0.76922100  |
| C | 5.85378000  | -2.30117200 | 2.19393300  |
| H | 6.71024900  | -1.78901400 | 2.63087600  |
| H | 4.91899700  | -1.85433800 | 2.54245800  |
| H | 5.86272800  | -3.36407500 | 2.44840200  |
| C | 4.99081500  | -2.64140600 | 0.01826000  |
| O | 4.06780900  | -3.27988300 | 0.48992200  |
| C | 4.49879600  | 0.67931600  | -0.03321200 |
| H | 4.11477600  | -0.14382000 | 0.57575900  |
| H | 3.75954100  | 1.47785900  | 0.04553700  |
| C | 5.83280200  | 1.17630900  | 0.53898000  |

|   |            |            |             |
|---|------------|------------|-------------|
| H | 6.59123600 | 0.39478500 | 0.40480800  |
| H | 6.16835000 | 2.04832700 | -0.04096600 |
| C | 5.75915500 | 1.55443900 | 2.02642900  |
| H | 6.76633800 | 1.81863400 | 2.37903300  |
| H | 5.45251000 | 0.67223800 | 2.60747500  |
| C | 4.79992700 | 2.71100000 | 2.34248000  |
| H | 3.78049200 | 2.42831900 | 2.05937000  |
| H | 5.06759600 | 3.57829100 | 1.72188100  |
| C | 4.81499700 | 3.10880500 | 3.82250400  |
| H | 4.12027400 | 3.93201400 | 4.02497300  |
| H | 4.52048800 | 2.26444400 | 4.45732100  |
| H | 5.81483200 | 3.43039500 | 4.13883000  |

Absolute energy = -2904.29842881 a.u.
